# Supplementary material for: SCF/c-Kit-activated signaling and angiogenesis require Gαi1 and Gαi3
Source: PubMed Central journal article supplement (PMC10092767; doi:10.7150/ijbs.82855), 2023-03-27

**Figure S1**

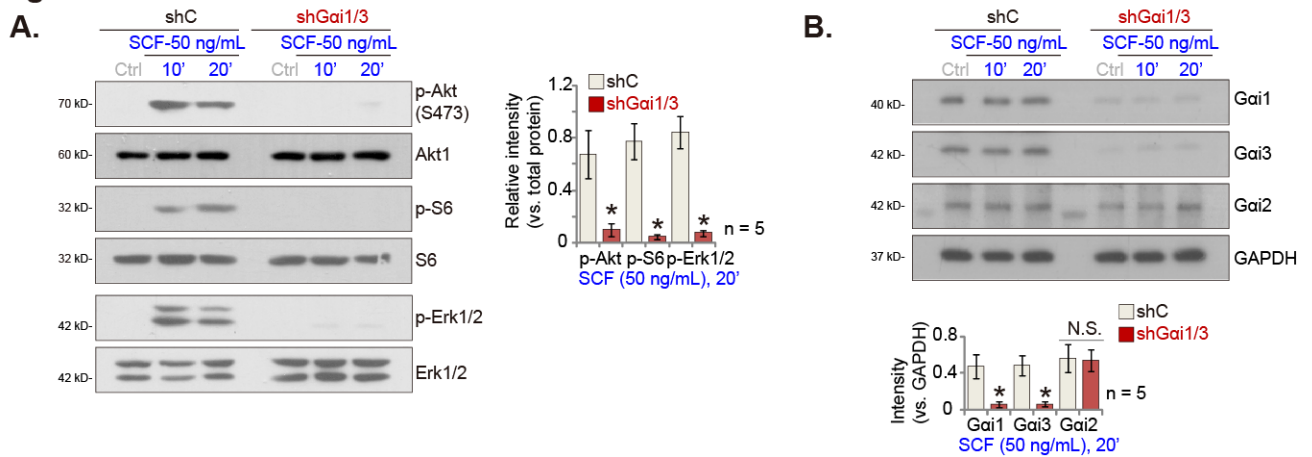

**Figure S1. Gai1 and Gai3 are required for SCF-induced Akt-mTOR and Erk activation in MEFs.** WT MEFs, with the lentiviral Gai1 (murine) shRNA plus the lentiviral Gai3 (murine) shRNA ("shGai1/3") (A-B) or the scramble control shRNA ("shC") (A-B), were cultivated and treated with SCF (50 ng/mL) for designated time, listed proteins were tested (A-B); Gai1/2/3 protein expression and protein phosphorylation were quantified (A-B). "Ctrl" stands for PBS treatment. \**P* < 0.05 versus "shC". "N. S." stands for *P* > 0.05.

## Figure S2

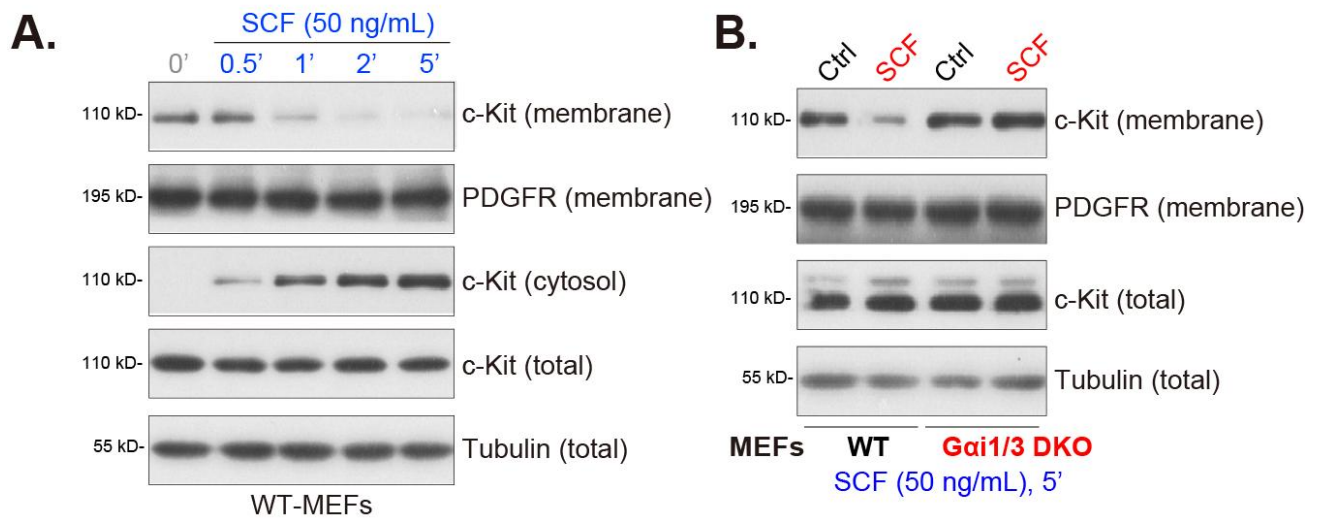

**Figure S2. *Gai1* and *Gai3* are important for SCF-induced membrane c-Kit internalization in MEFs.** WT MEFs were treated with SCF (50 ng/mL) for 0.5-5 min, listed proteins in membrane fraction lysates, cytosol fraction lysates and total cell lysates were examined (A). WT or *Gai1/3* DKO MEFs were treated with SCF (50 ng/mL) for 5 min, listed proteins in membrane fraction lysates and total cell lysates were examined (B). “Ctrl” stands for PBS treatment.

**Figure S3.**

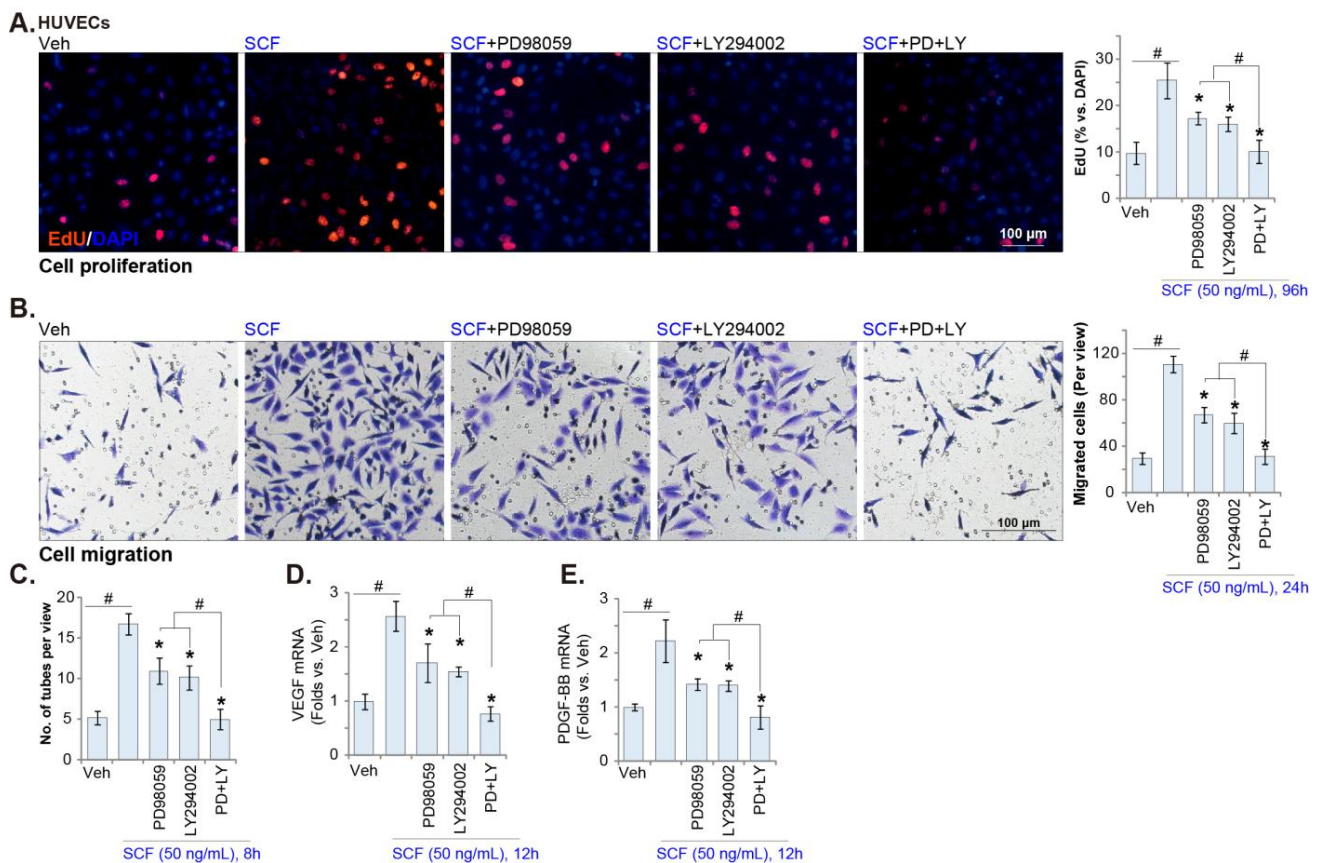

**Figure S3. PI3K-Akt-mTOR and Erk inhibition suppresses SCF-induced pro-angiogenic activity in HUVECs.** HUVECs were pretreated with PD98059 (5  $\mu$  M), LY294002 (5  $\mu$  M) or PD98059 plus LY294002 (“PD+LY”) for 30 min, followed by SCF (50 ng/mL) treatment; HUVECs were cultivated for applied time periods, cell proliferation (**A**), migration (**B**) and formed tubes (**C**) were tested. Expression of listed mRNAs was examined (**D** and **E**). “Veh” stands for vehicle control group. \*  $P < 0.05$  versus “SCF” only treatment. #  $P < 0.05$ . Scale bar = 100  $\mu$ m.

**Figure S4.**

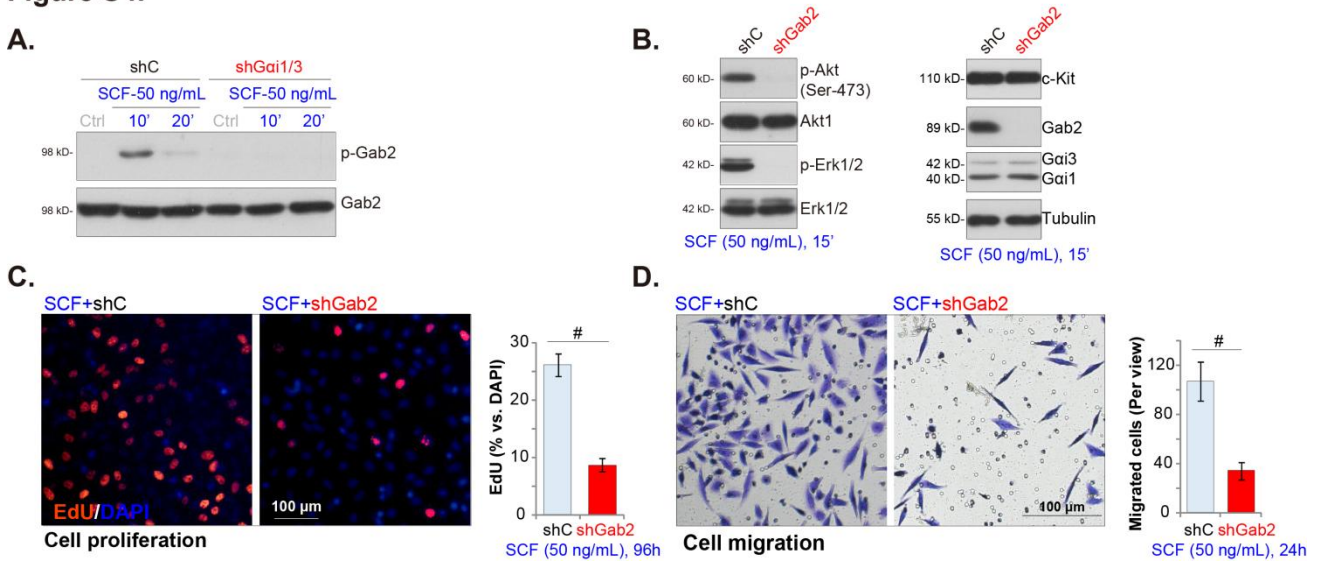

**Figure S4. Gab2 is vital for SCF-induced signaling and angiogenesis in HUVECs.** Stable HUVECs, with the lentiviral human Gai1 shRNA plus lentiviral human Gai3 shRNA (“shGai1/3”) or scramble control shRNA (“shC”), were treated with SCF (50 ng/mL) for 10/20 min, listed proteins were examined (A). Stable HUVECs, with the lentiviral Gab2 shRNA (“shGab2”) or scramble control shRNA (“shC”), were treated with SCF (50 ng/mL) for 15 min, listed proteins were examined (B); HUVECs were further cultivated for applied time, cell proliferation (C) and *in vitro* migration (D) were examined. #*P* < 0.05. Scale bar = 100  $\mu$ m.

# Figure S5. The uncropped blotting images of the study.

## Figure 1

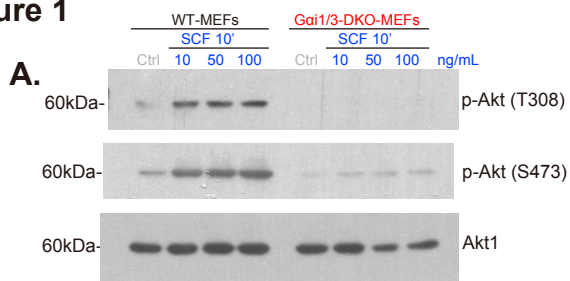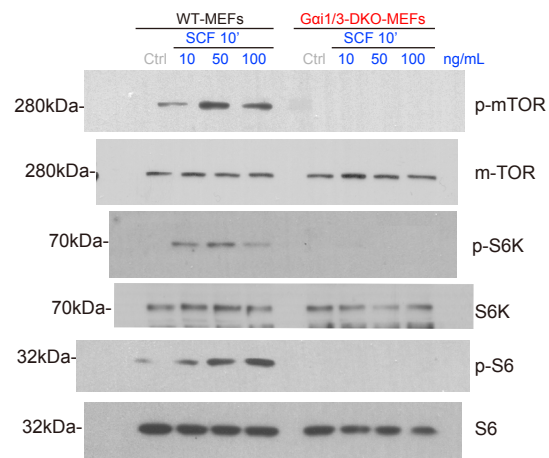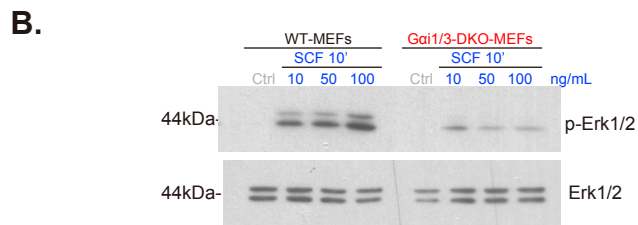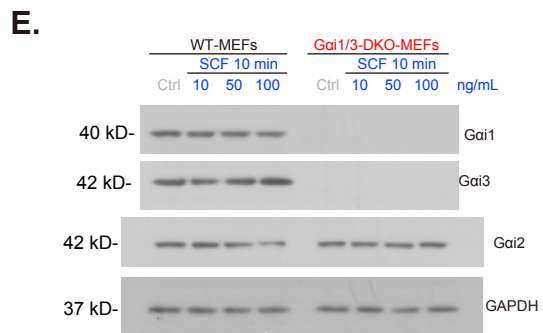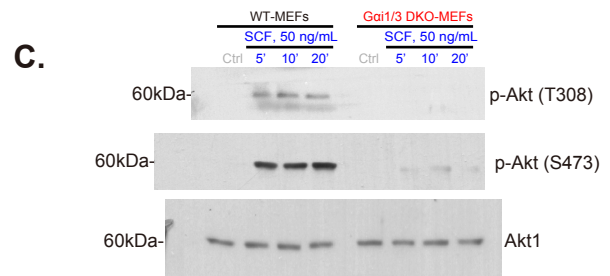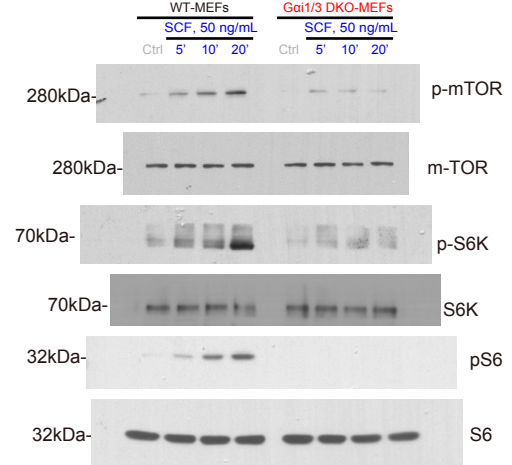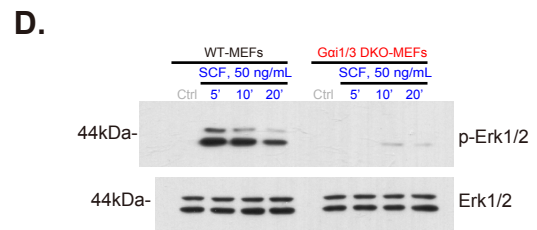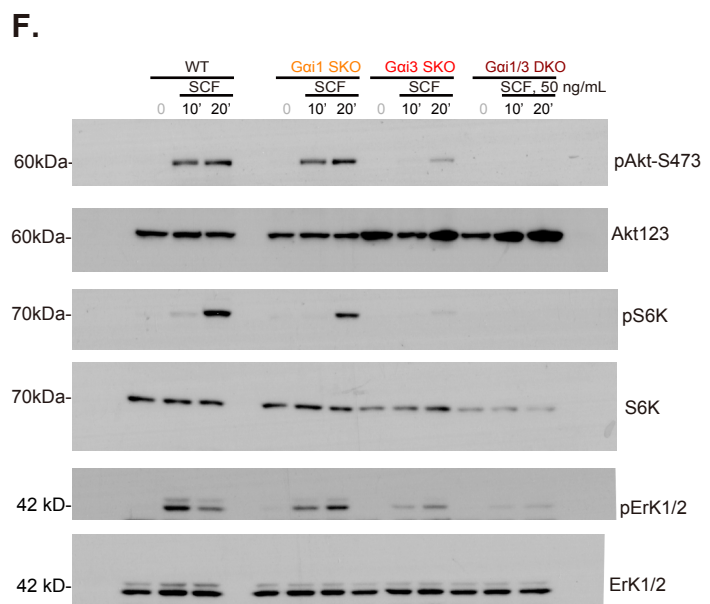

**Figure 2**

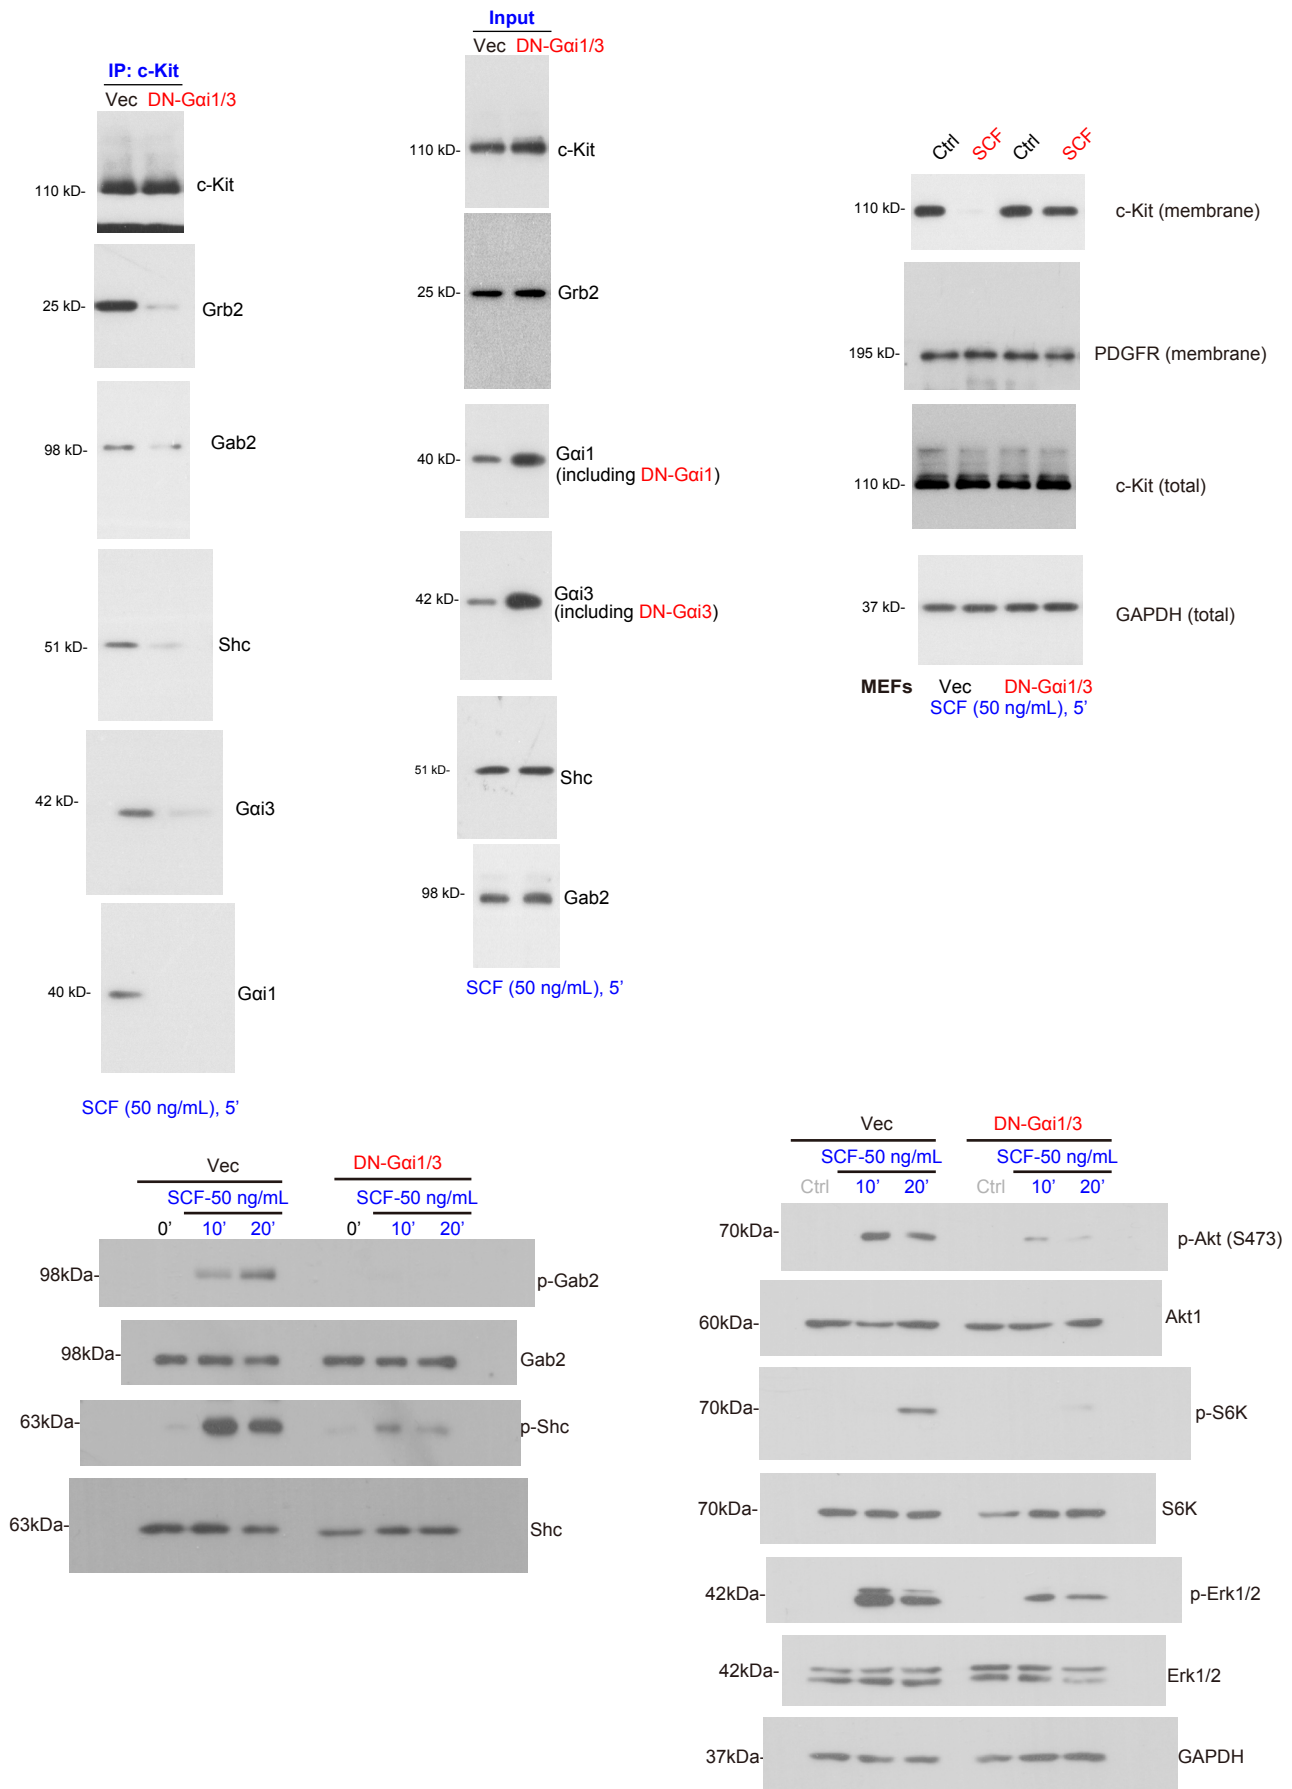



**Figure 4.**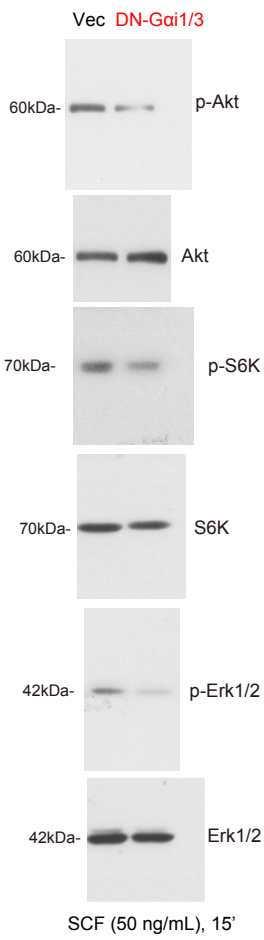**Figure 5.**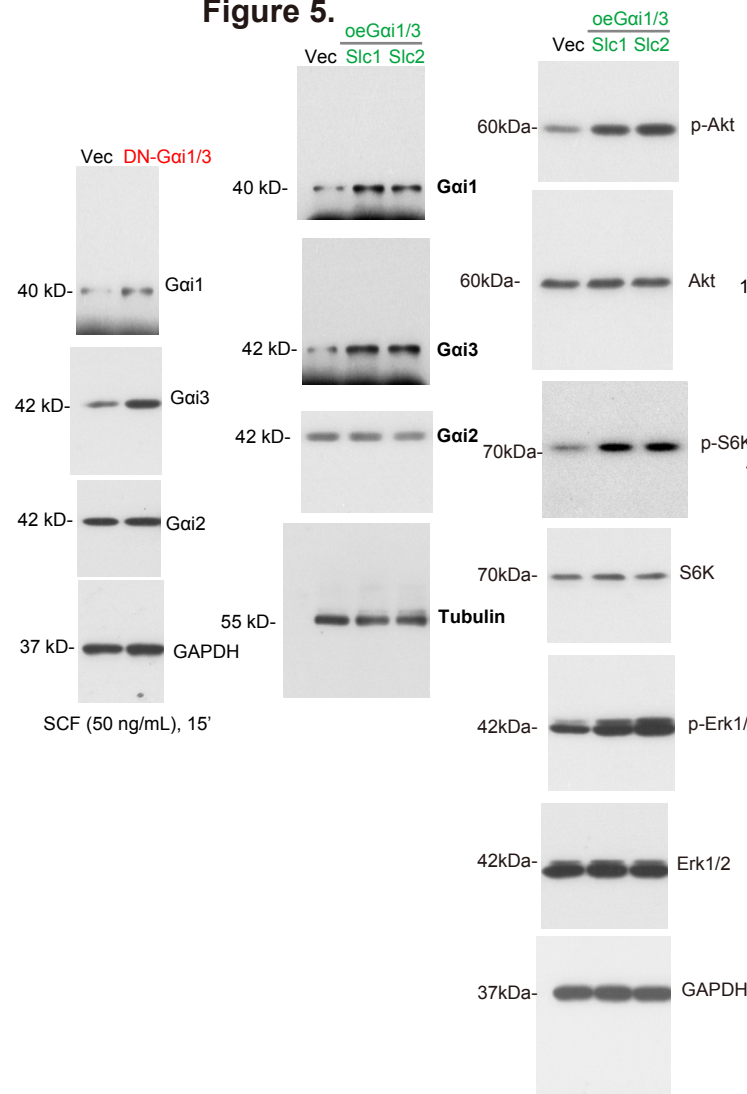**Figure 8.**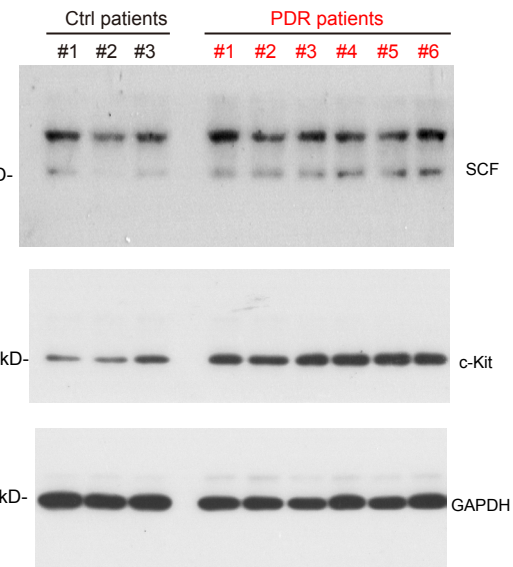**Figure 6.**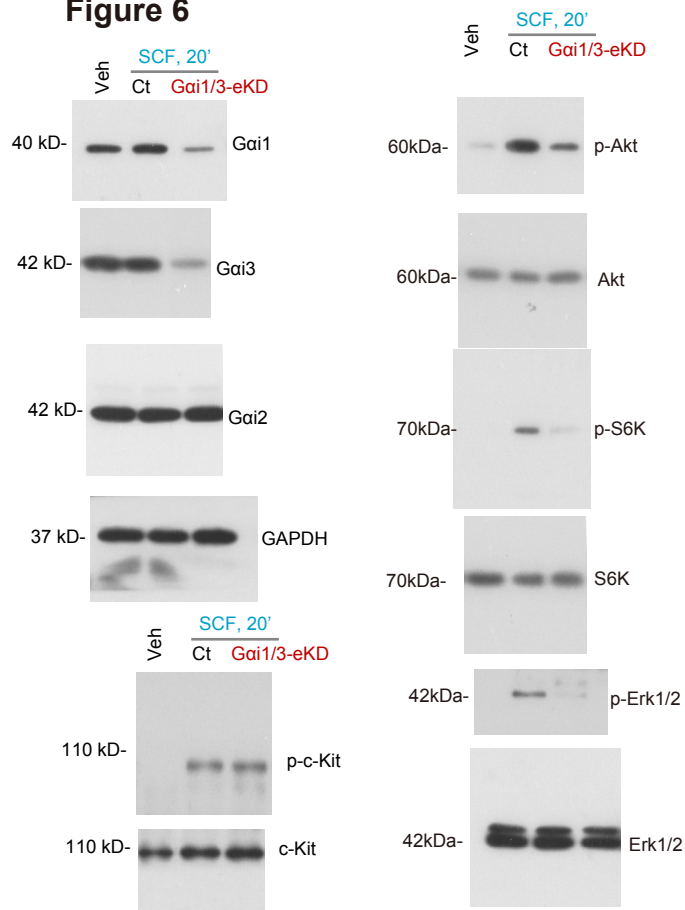**Figure 7.**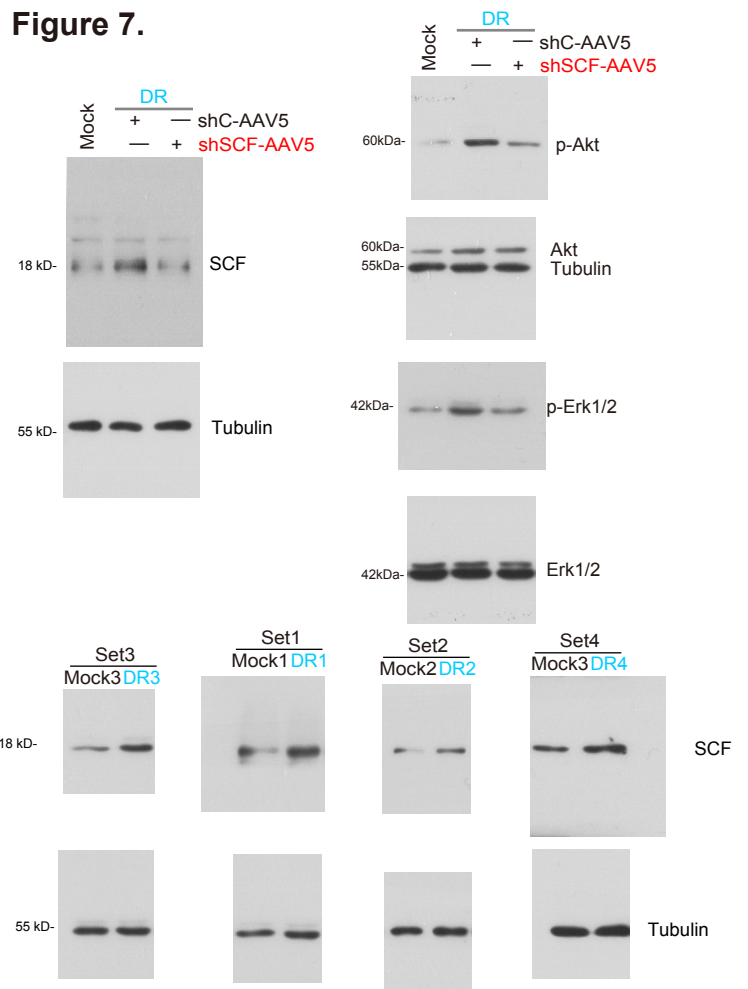



**Figure S1****A.**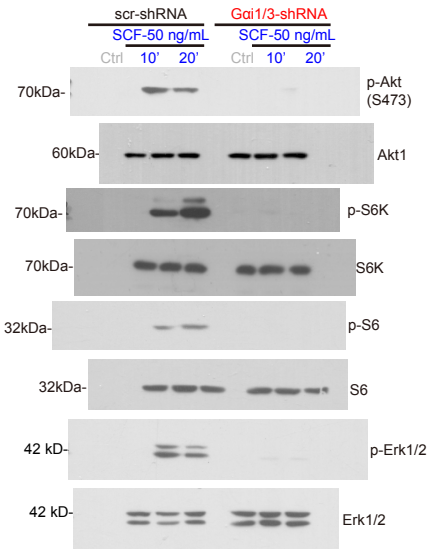**B.**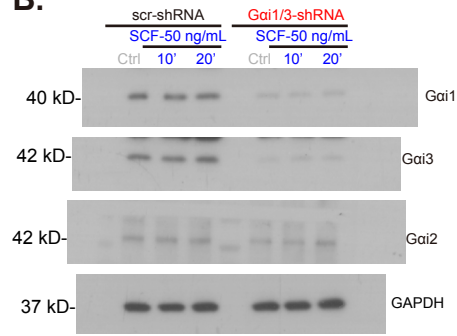**Figure S2**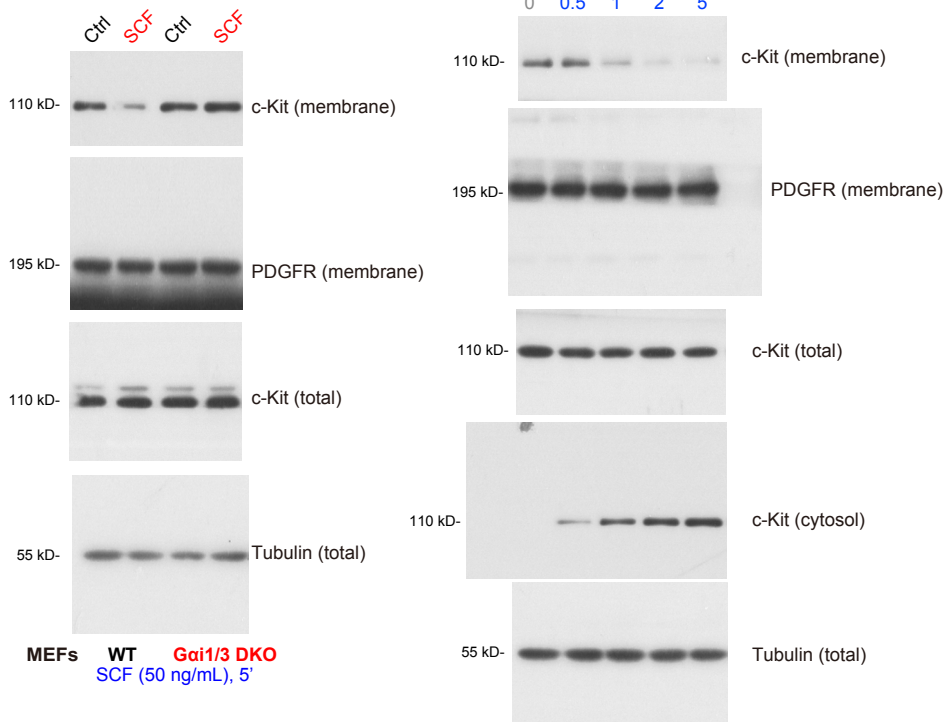**Figure S4.**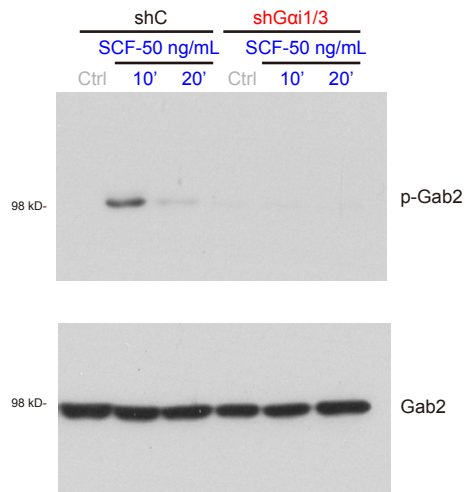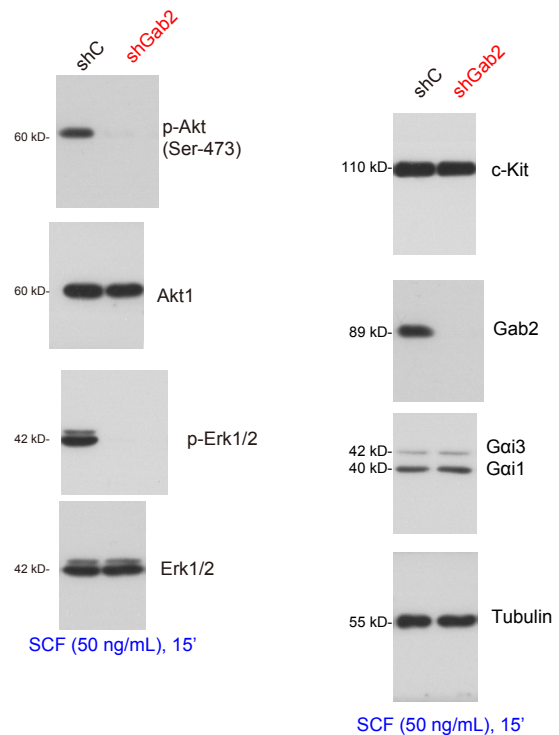

Supplement: ijbsv19p1910s1.pdf [file ijbsv19p1910s1.pdf]
